# Supplementary material
Source: Springer Nature journal article supplement (https://www.springermedizin.de/resource/supplementary/12992_2012_217_MOESM3_ESM.pdf/9616696)
Supplement: MOESM3 [file 9616696]

1. Does the GHA bring up the issue of user fees / access to healthcare / free care?

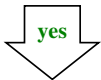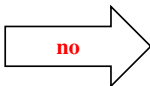

**NO STANCE**

2. Does the GHA take a stance on the issue of user fee?

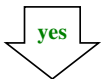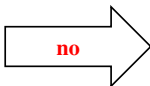

**NEUTRAL STANCE**

3. Does the GHA state that it is in favor of user fees OR opposed to free care at the point of delivery?

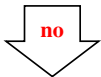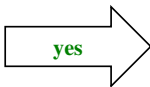

**NEGATIVE STANCE**

4. Does the GHA state that it is against user fees OR in favour free care at the point of delivery?

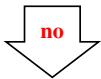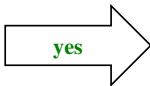

**POSITIVE STANCE**

5. Does the GHA state that it is both in favour or user fees and in favour of free care at the point of delivery?

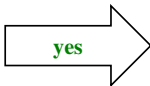

**NUANCED STANCE**
